# Supplementary material
Source: PubMed Central journal article supplement (PMC9094690)
Supplement: NIHMS1787278-supplement-2.pdf [file NIHMS1787278-supplement-2.pdf]

Supplementary Materials for  
**Therapeutic liver repopulation by transient acetaminophen  
selection of gene-modified hepatocytes**

Anne Vonada *et al.*

Corresponding author: Markus Grompe, [grompem@ohsu.edu](mailto:grompem@ohsu.edu)

*Sci. Transl. Med.* **13**, eabg3047 (2021)  
DOI: 10.1126/scitranslmed.abg3047

**The PDF file includes:**

Figs. S1 to S5  
Tables S1 and S2

**Other Supplementary Material for this manuscript includes the following:**

Data file S1

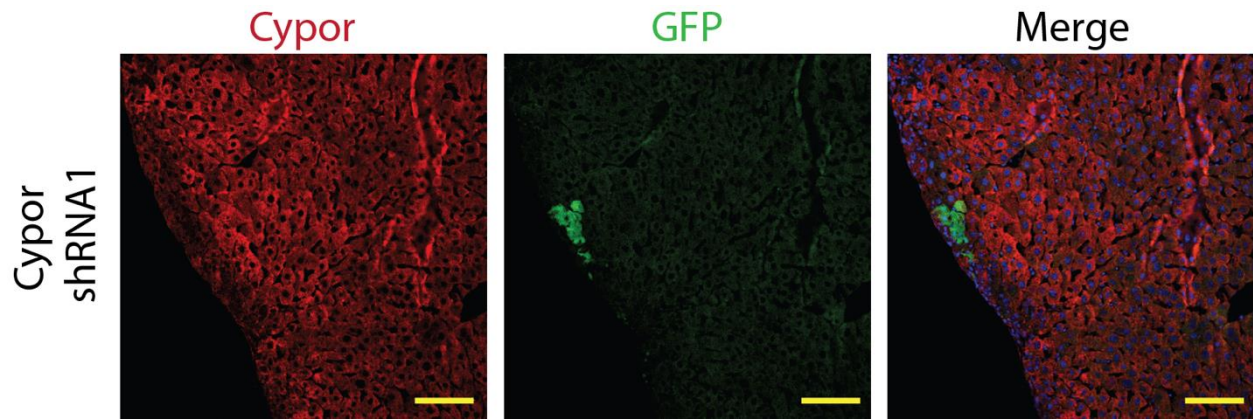

**Figure S1. Cypor immunohistochemistry and GFP expression in mice receiving a *Cypor*-shRNA1 containing transposon.** Cypor immunofluorescent staining and GFP expression in liver sections from mice treated with *Cypor* shRNA1 GFP-expression transposon vector and APAP selection (n = 3). Scale bars, 100  $\mu$ m.

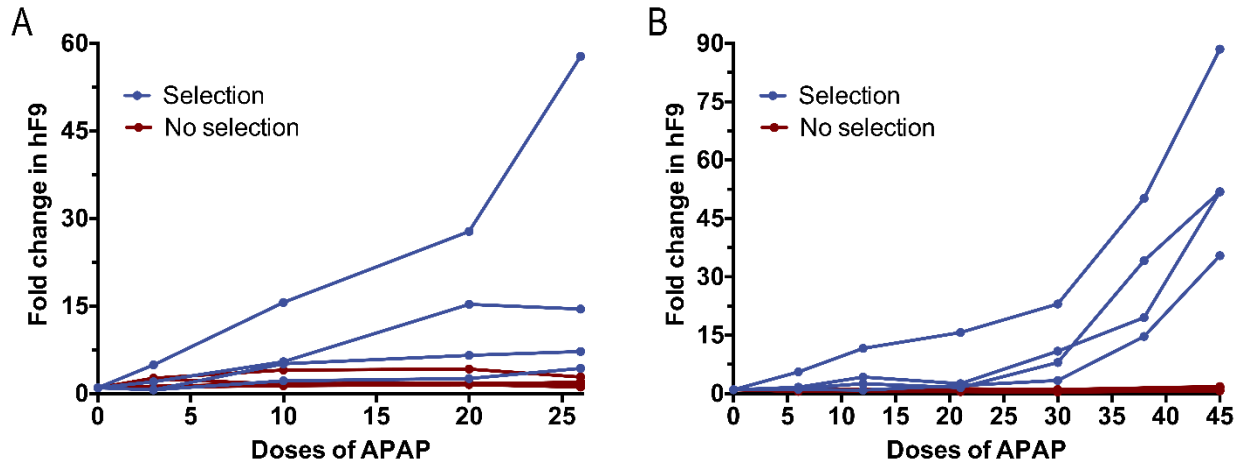

**Figure S2. Fold change in hF9 in mice treated with lentiviral vectors.** Fold change over baseline in blood hF9 concentration with repeated APAP injection in mice treated with LV-*hF9-Cypor* gRNA (A) or LV-*hF9-Cypor* shRNA (B). n = 4 for all groups.

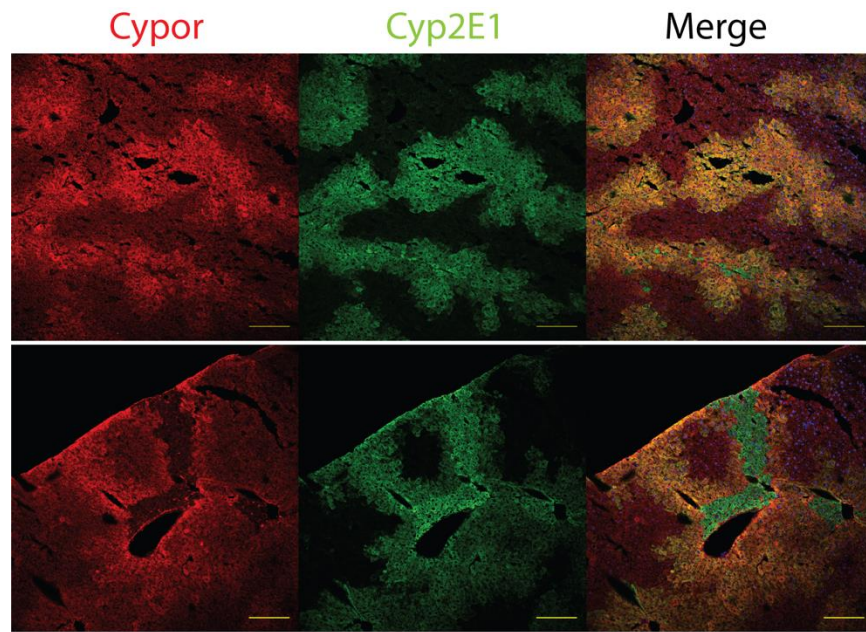

9.3% Cypor-deficient hepatocytes, hF9= 3136 ng/mL

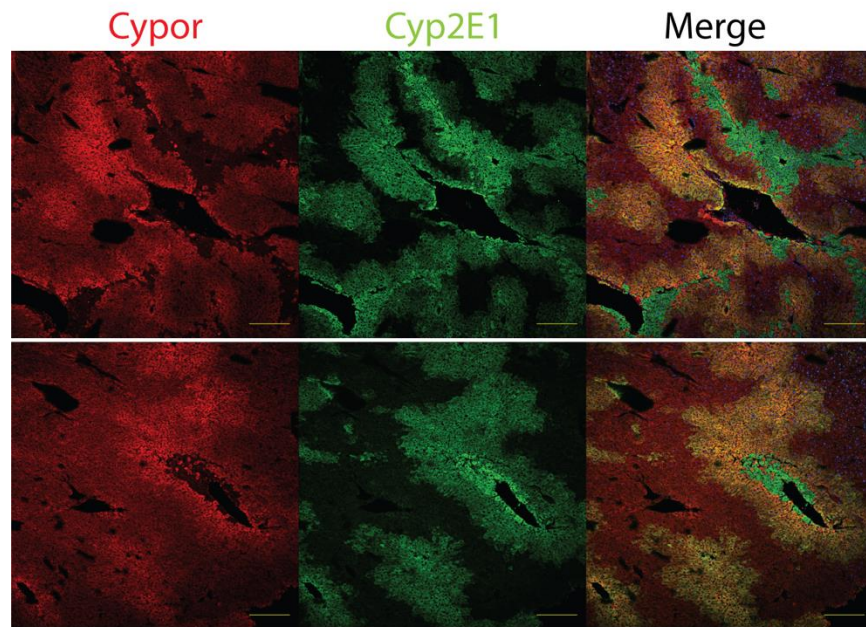

8.5% Cypor-deficient hepatocytes, hF9= 3144 ng/mL

**Figure S3. Additional Cypor/Cyp2E1 immunohistochemistry in partially selected mice.**

Cypor and Cyp2E1 immunohistochemistry in two mice which were partially selected. Scale bars, 200  $\mu$ m. The percentage of Cypor deficient hepatocytes determined by in-del analysis in hepatocytes and blood levels of hF9 at harvest are indicated below each set of images.

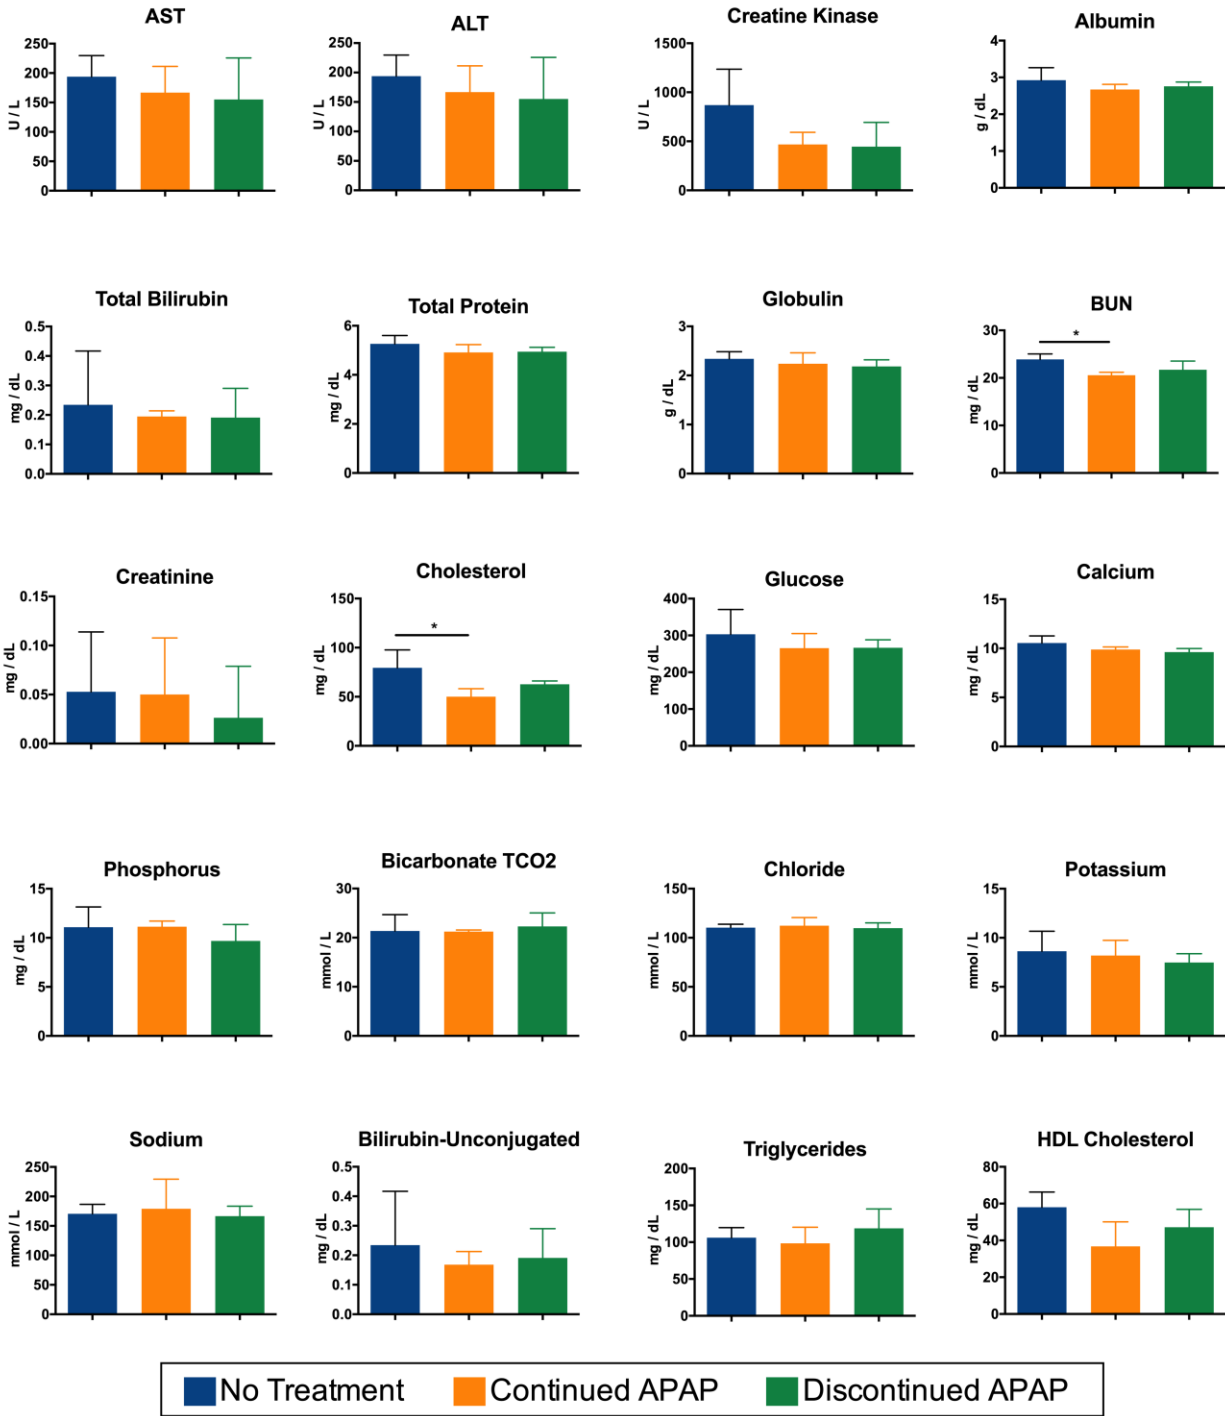

**Figure S4. Liver and lipid panel in long-term selected mice.** Results of a full liver function test and lipid panel in mice receiving continued weekly APAP or no further APAP for 42 weeks after selection and untreated controls. n = 4 for all groups. Differences are not significant unless indicated. Data are means  $\pm$  SD. \*P<0.05 by Mann-Whitney U test.

Continued APAP

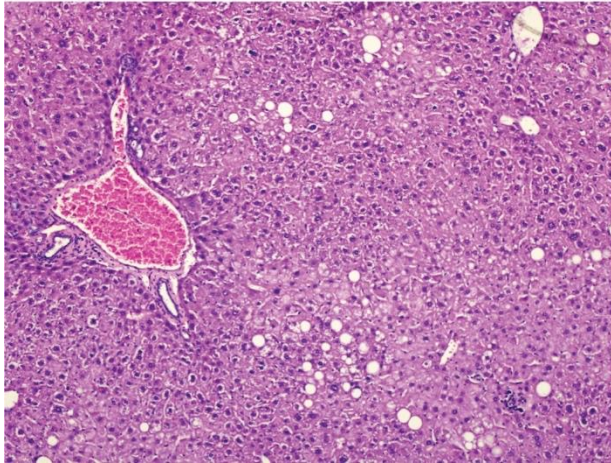

Discontinued APAP

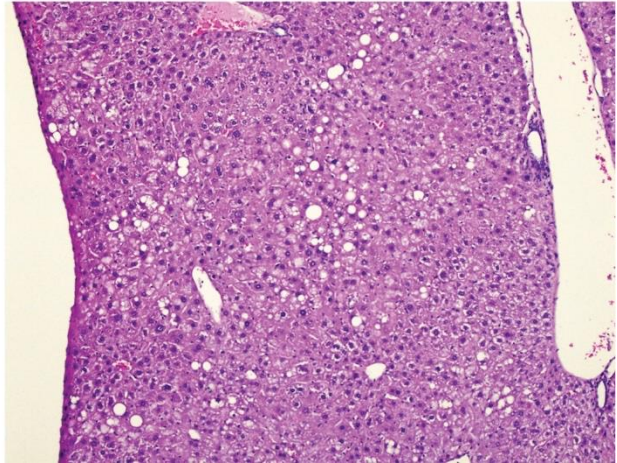

**Figure S5. Histology in long term selected mice.** H&E staining of liver sections in APAP selected mice receiving either continued weekly APAP or no further APAP for 42 weeks.

**Table S1. Quantification of Cypor-negative hepatocytes by image analysis.** Approximate quantification of Cypor-negative liver area by measurement of representative IF images for mice treated with the *Cypor* shRNA containing vectors and APAP selection. No APAP control animals were not quantifiable by this method.

| <i>Cypor</i> shRNA transposon        |                              |
|--------------------------------------|------------------------------|
| Mouse ID                             | % Cypor-negative hepatocytes |
| A                                    | 62% (Fig. 2E)                |
| B                                    | 38%                          |
| C                                    | 50%                          |
| LV- <i>hF9-Cypor</i> shRNA           |                              |
| Mouse ID                             | % Cypor-negative hepatocytes |
| A                                    | 14%                          |
| B                                    | 6%                           |
| C                                    | 11%                          |
| D                                    | 11%                          |
| LV- <i>PAH-Cypor</i> shRNA - Females |                              |
| Mouse ID                             | % Cypor-negative hepatocytes |
| A                                    | 45%                          |
| B                                    | 40%                          |
| C                                    | 51%                          |
| LV- <i>PAH-Cypor</i> shRNA - Males   |                              |
| Mouse ID                             | % Cypor-negative hepatocytes |
| A                                    | 56%                          |
| B                                    | 43% (Fig. 4E)                |
| C                                    | 45%                          |
| D                                    | 50%                          |

**Table S2. hF9 concentrations and proportion Cypor-deficient hepatocytes in partially selected mice.** Transgenic cas9 mice that received a hydrodynamic injection of pX330-*Cypor* gRNA and underwent partial APAP selection. Cypor deficient hepatocytes were quantified by TIDE analysis. Mice numbered 10 to 13 underwent partial hepatectomy and analysis was based on the liver tissue that was removed.

| Mouse   | Baseline hF9<br>(ng/mL) | Final hF9<br>(ng/mL) | hF9 fold increase | % Cypor-deficient<br>hepatocytes |
|---------|-------------------------|----------------------|-------------------|----------------------------------|
| 1       | 56                      | 3307                 | 59                | 16.7                             |
| 2       | 32                      | 3820                 | 119               | 14.7                             |
| 3       | 61                      | 3136                 | 51                | 9.3                              |
| 4       | 82                      | 3662                 | 45                | 10.2                             |
| 5       | 36                      | 3181                 | 88                | 15.3                             |
| 6       | 9                       | 3144                 | 349               | 8.5                              |
| 7       | 30                      | 4224                 | 141               | 9.8                              |
| 8       | 12                      | 3009                 | 251               | 6.7                              |
| 9       | 33                      | 3159                 | 96                | 10.8                             |
| 10 (PH) |                         | 1579                 |                   | 2.2                              |
| 11 (PH) |                         | 3555                 |                   | 5.8                              |
| 12 (PH) |                         | 2057                 |                   | 3                                |
| 13 (PH) |                         | 995                  |                   | 1.5                              |
